# Supplementary material for: Identification of Crucial Parameters in a Mathematical Multiscale Model of Glioblastoma Growth
Source: Hindawi journal article supplement (doi:10.1155/2014/437094), 2014-01-01
Supplement: f1 [file 437094.f1.pdf]

# Supplementary Material: Sensitivity Coefficients

Tina A. Schuetz    Andreas Mang    Stefan Becker    Alina Toma    Thorsten M. Buzug

## 1 Sensitivity coefficients and partitioning of reaction parameters

In the following the four sensitivity coefficients  $S^{time}$ ,  $S^{total}$ ,  $S^{mig}$  and  $S^{prolif}$  are shown for each reaction parameter  $k_1 - k_{18}^m$ . To enable a compact, though still meaningful presentation we partitioned the 31 parameters in three distinct groups. For each parameter group the sensitivity coefficients are shown separately. Parameter group 1 includes the reaction parameters  $k_1, k_1^i, k_2, k_3, k_4, k_5, k_6, k_7, k_8, k_9$  and  $k_{10}$ . Parameter group 2 contains the reaction parameters  $k_{11}^m, k_{11}^{c1}, k_{11}^{m2}, k_{11}^{c2}, k_{12}^i, k_{12}, k_{13}^m, k_{13}^{c1}, k_{13}^{m2}, k_{13}^{c2}$  and  $k_{14}$ . The parameters  $k_{15}^i, k_{15}, k_{16}, k_{17}^m, k_{17}^{c1}, k_{17}^{m2}, k_{17}^{c2}, k_{18}^m$  and  $k_{18}^c$  are embraced in parameter group 3. This parameter division is also shown in Fig. S1.

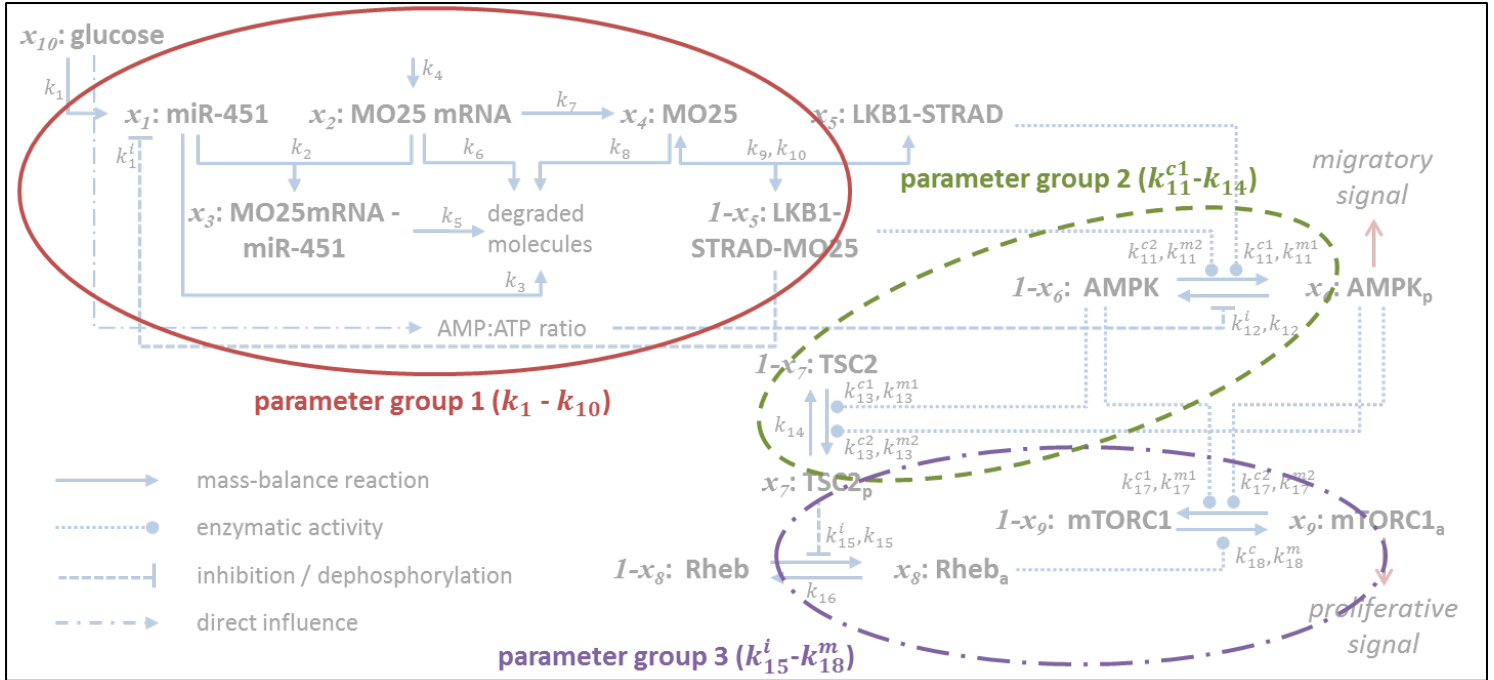

Figure S1: Partitioning of reaction parameters in three disjunct groups.

## 2 Parameter Overview

In Fig. S2 the sensitivity coefficients for the number of time steps  $S^{time}$  is shown for the parameters of parameter group 1. Fig. S3 displays the sensitivity coefficients for the total number of tumor cells in the last time step  $S^{total}$  for the first parameter group. Fig. S4 and Fig. S5 summarize the sensitivity coefficients for the number of migrating and proliferating cells in the last time step,  $S^{mig}$  and  $S^{prolif}$ , respectively.

The results of the sensitivity coefficients  $S^{time}$ ,  $S^{total}$ ,  $S^{mig}$  and  $S^{prolif}$  for the second parameter group are shown in Fig. S6 - S9. The sensitivity coefficients of the parameters that are included in parameter group 3 are presented in Fig. S10 - S13.

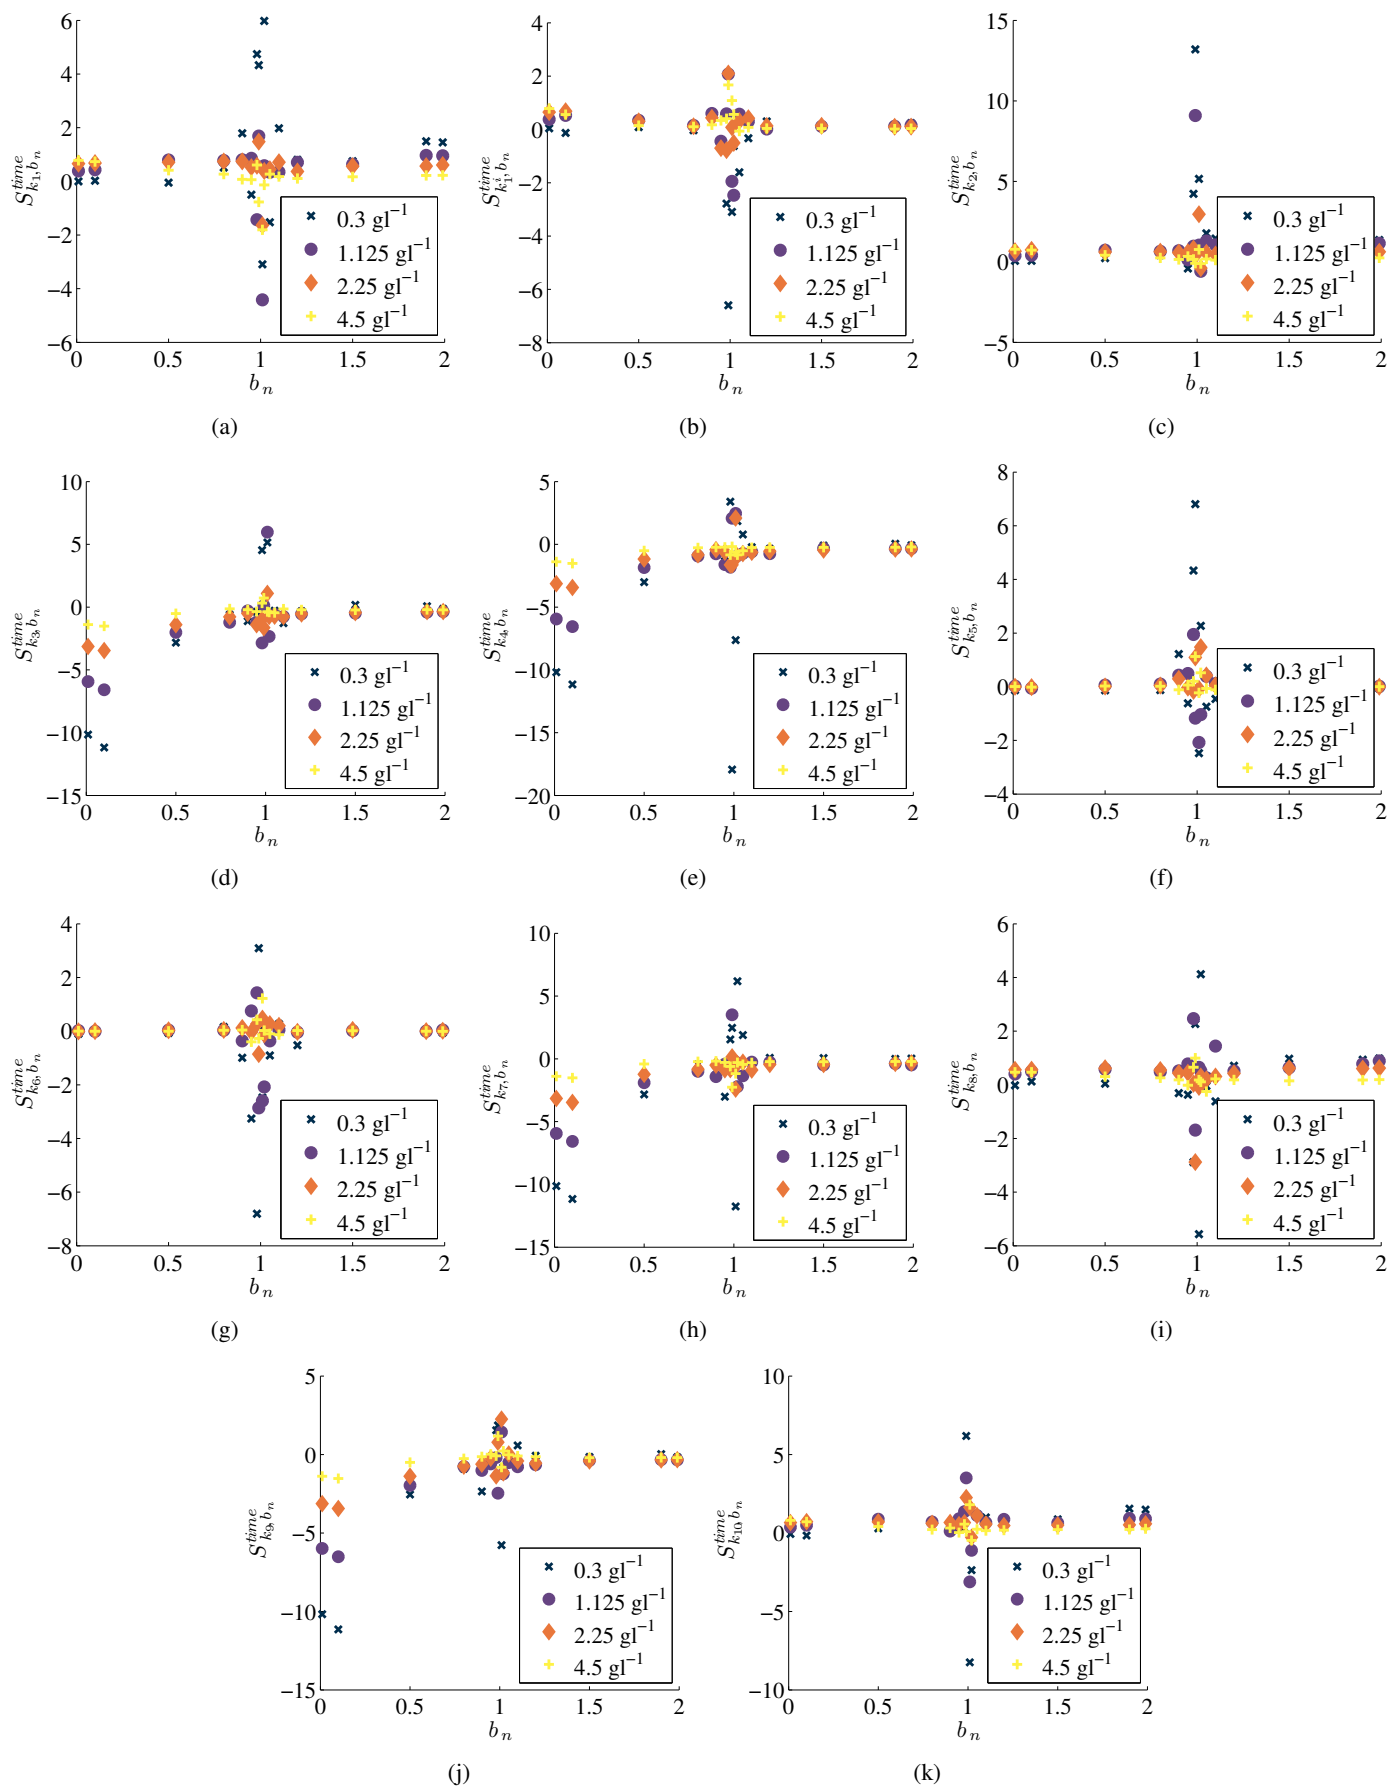

Figure S2:  $S^{time}$  for all parameters in parameter group 1.

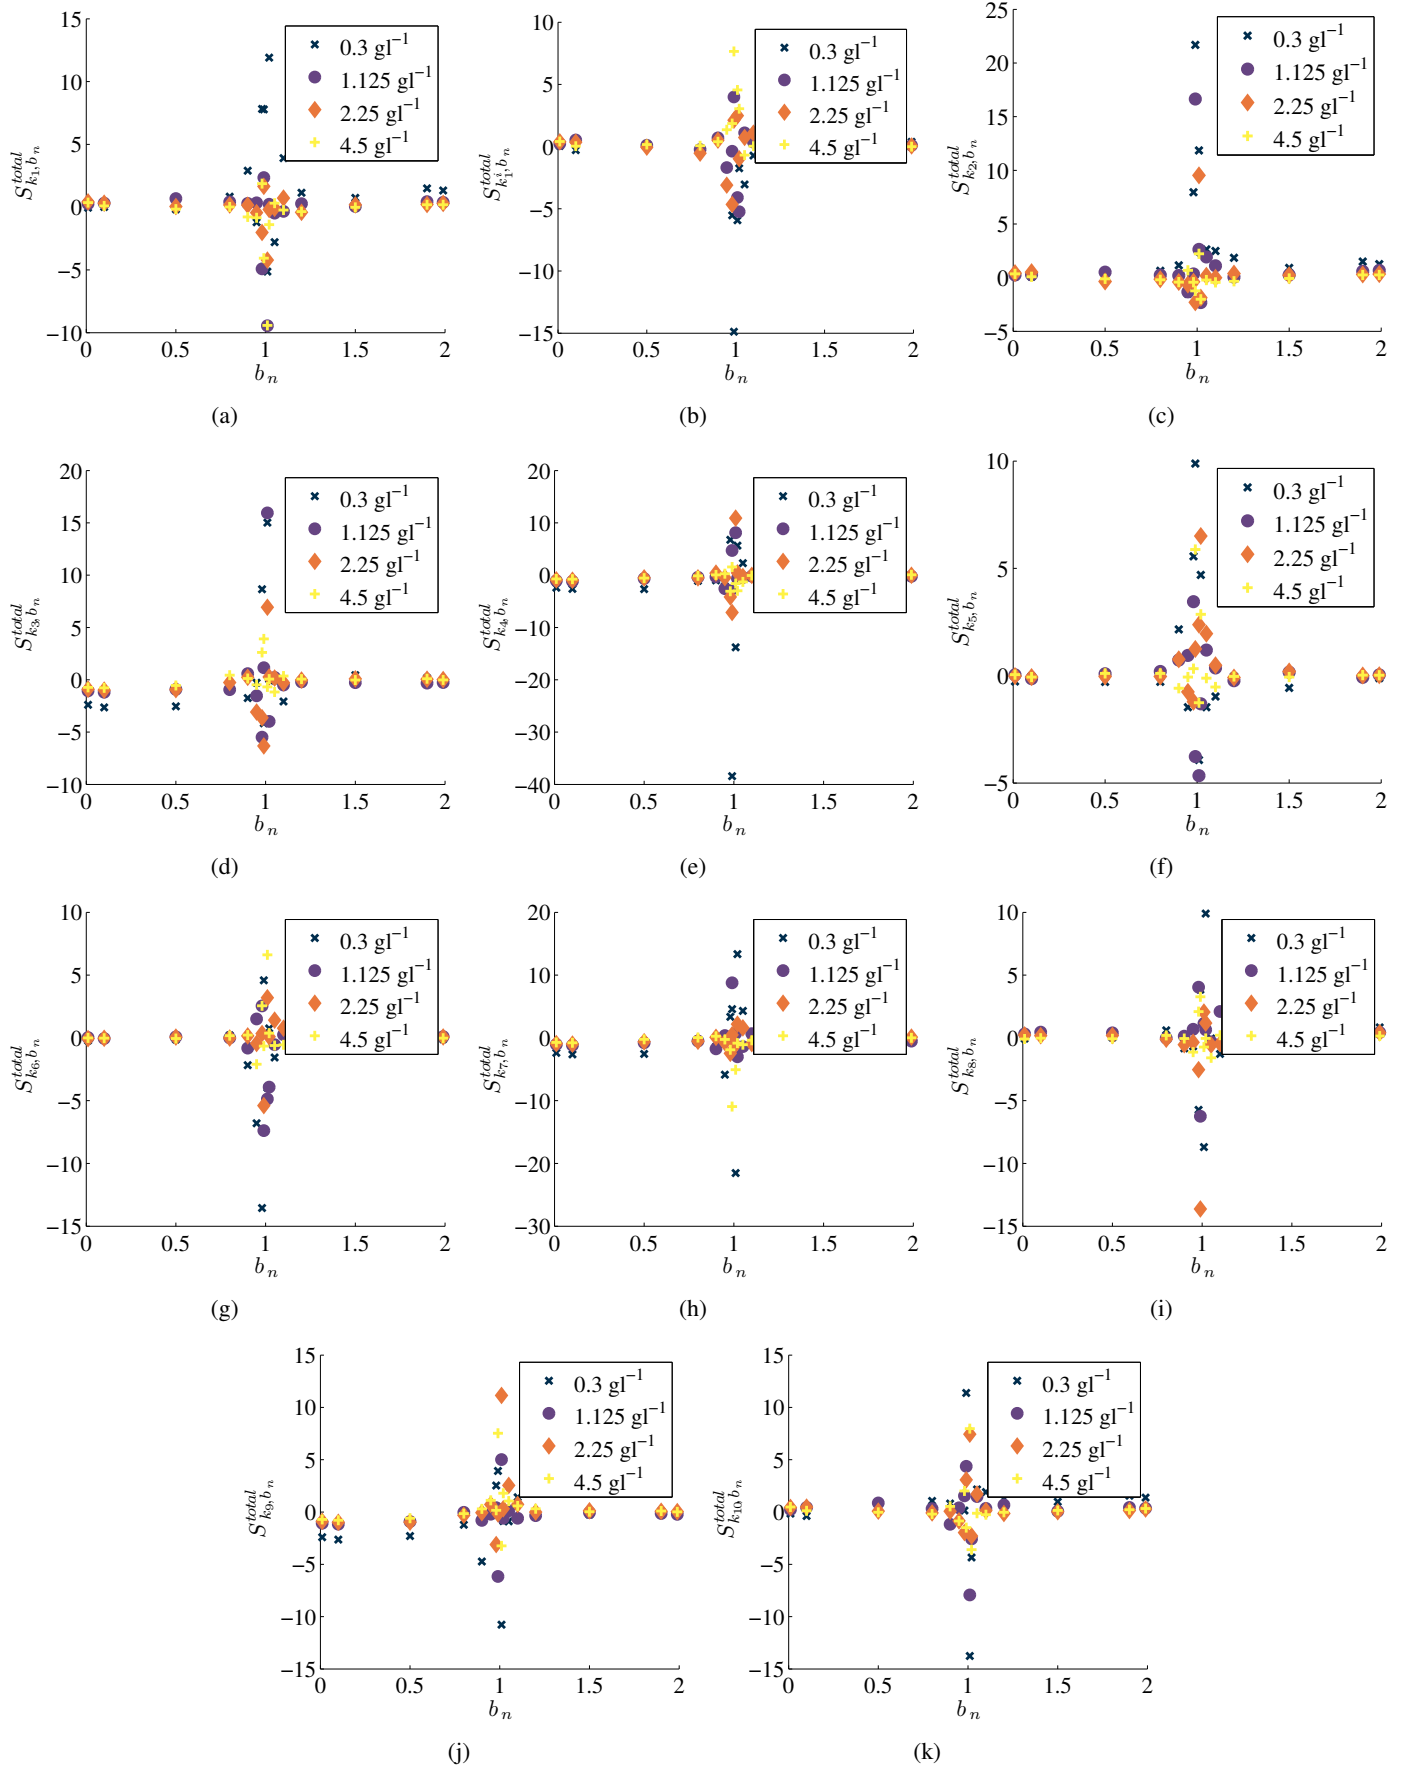

Figure S3:  $S^{\text{total}}$  for all parameters in parameter group 1.

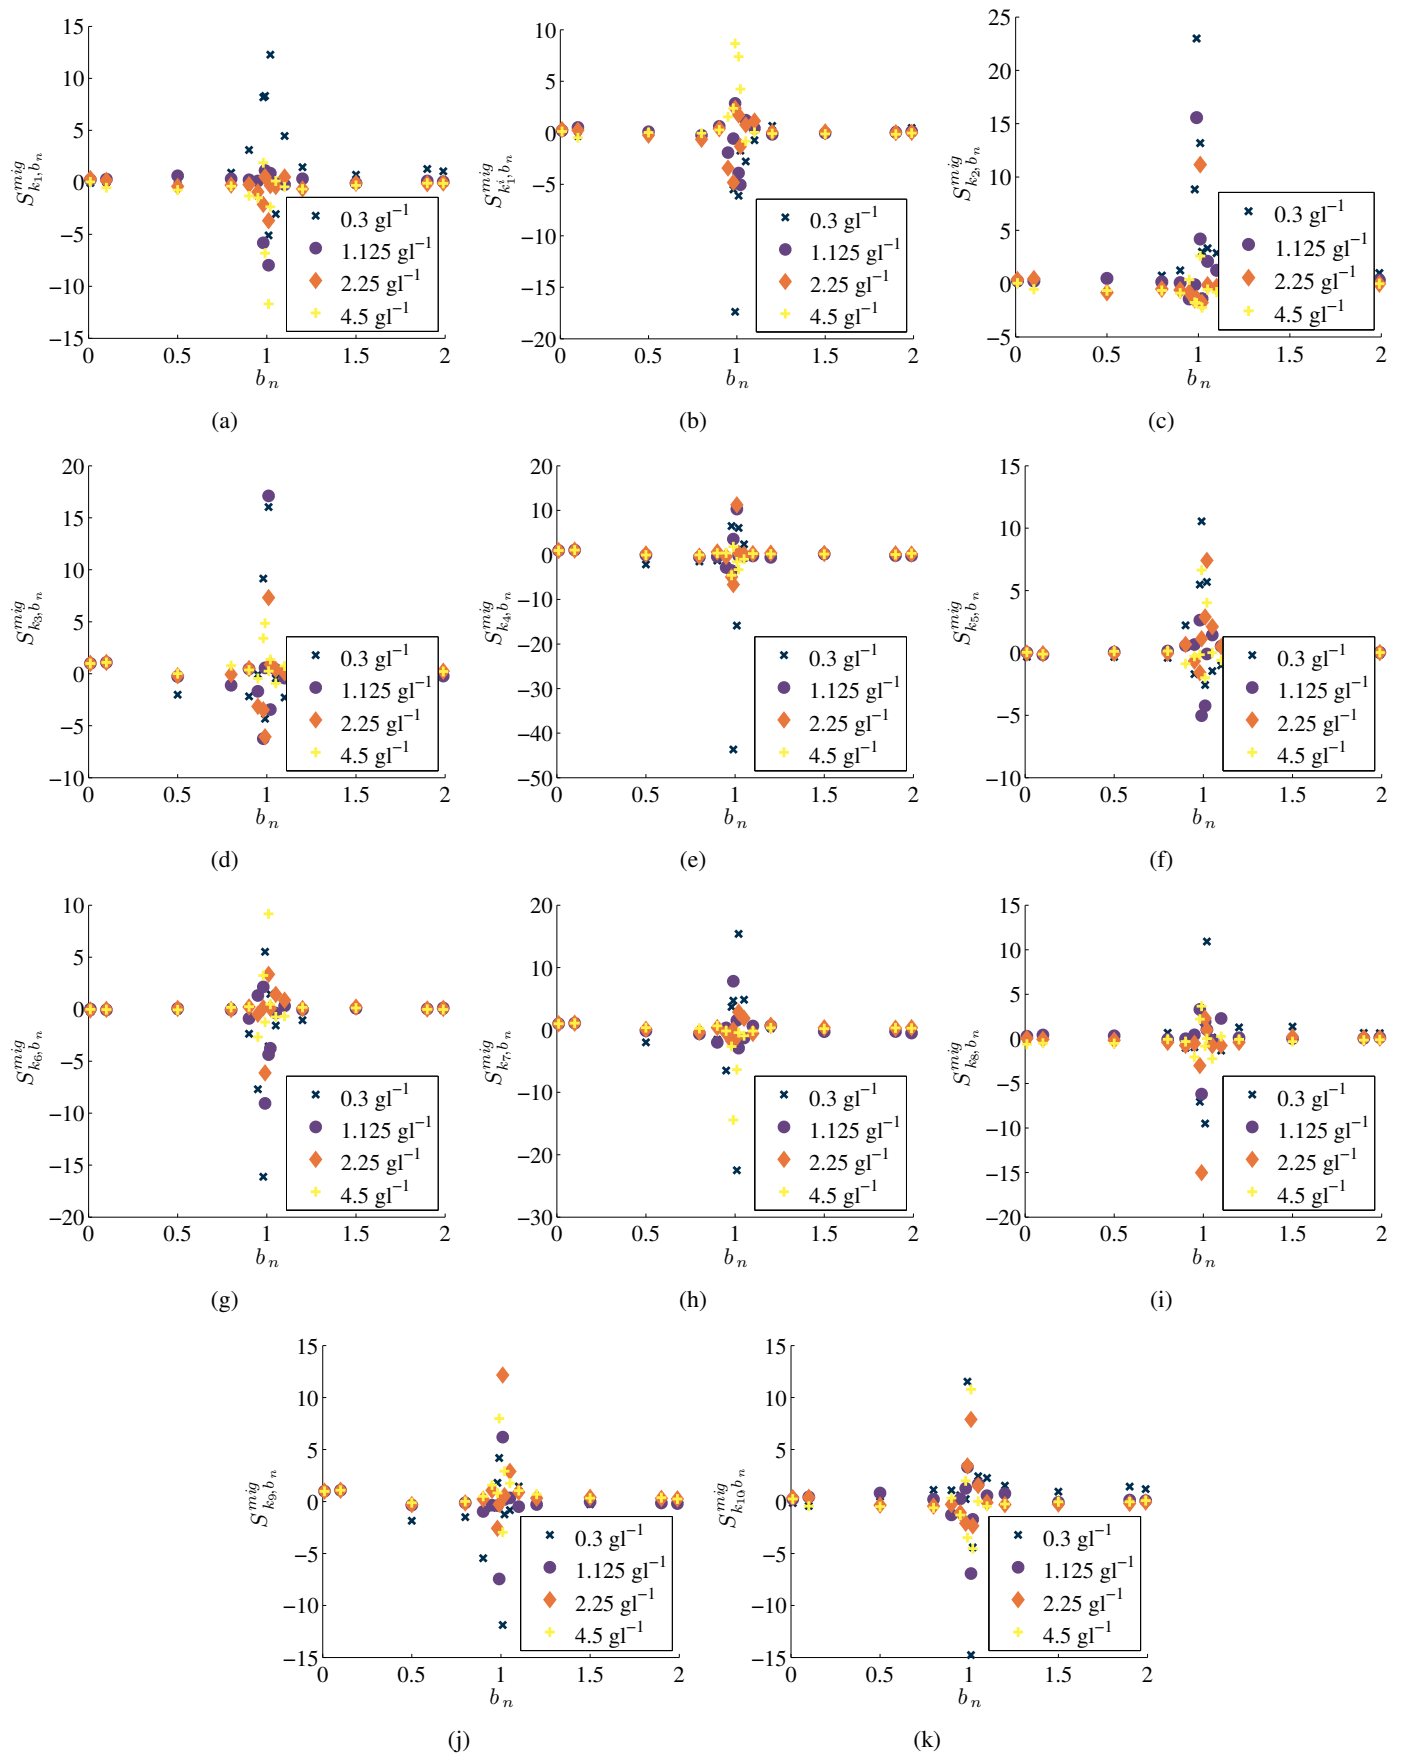

Figure S4:  $S^{mig}$  for all parameters in parameter group 1.

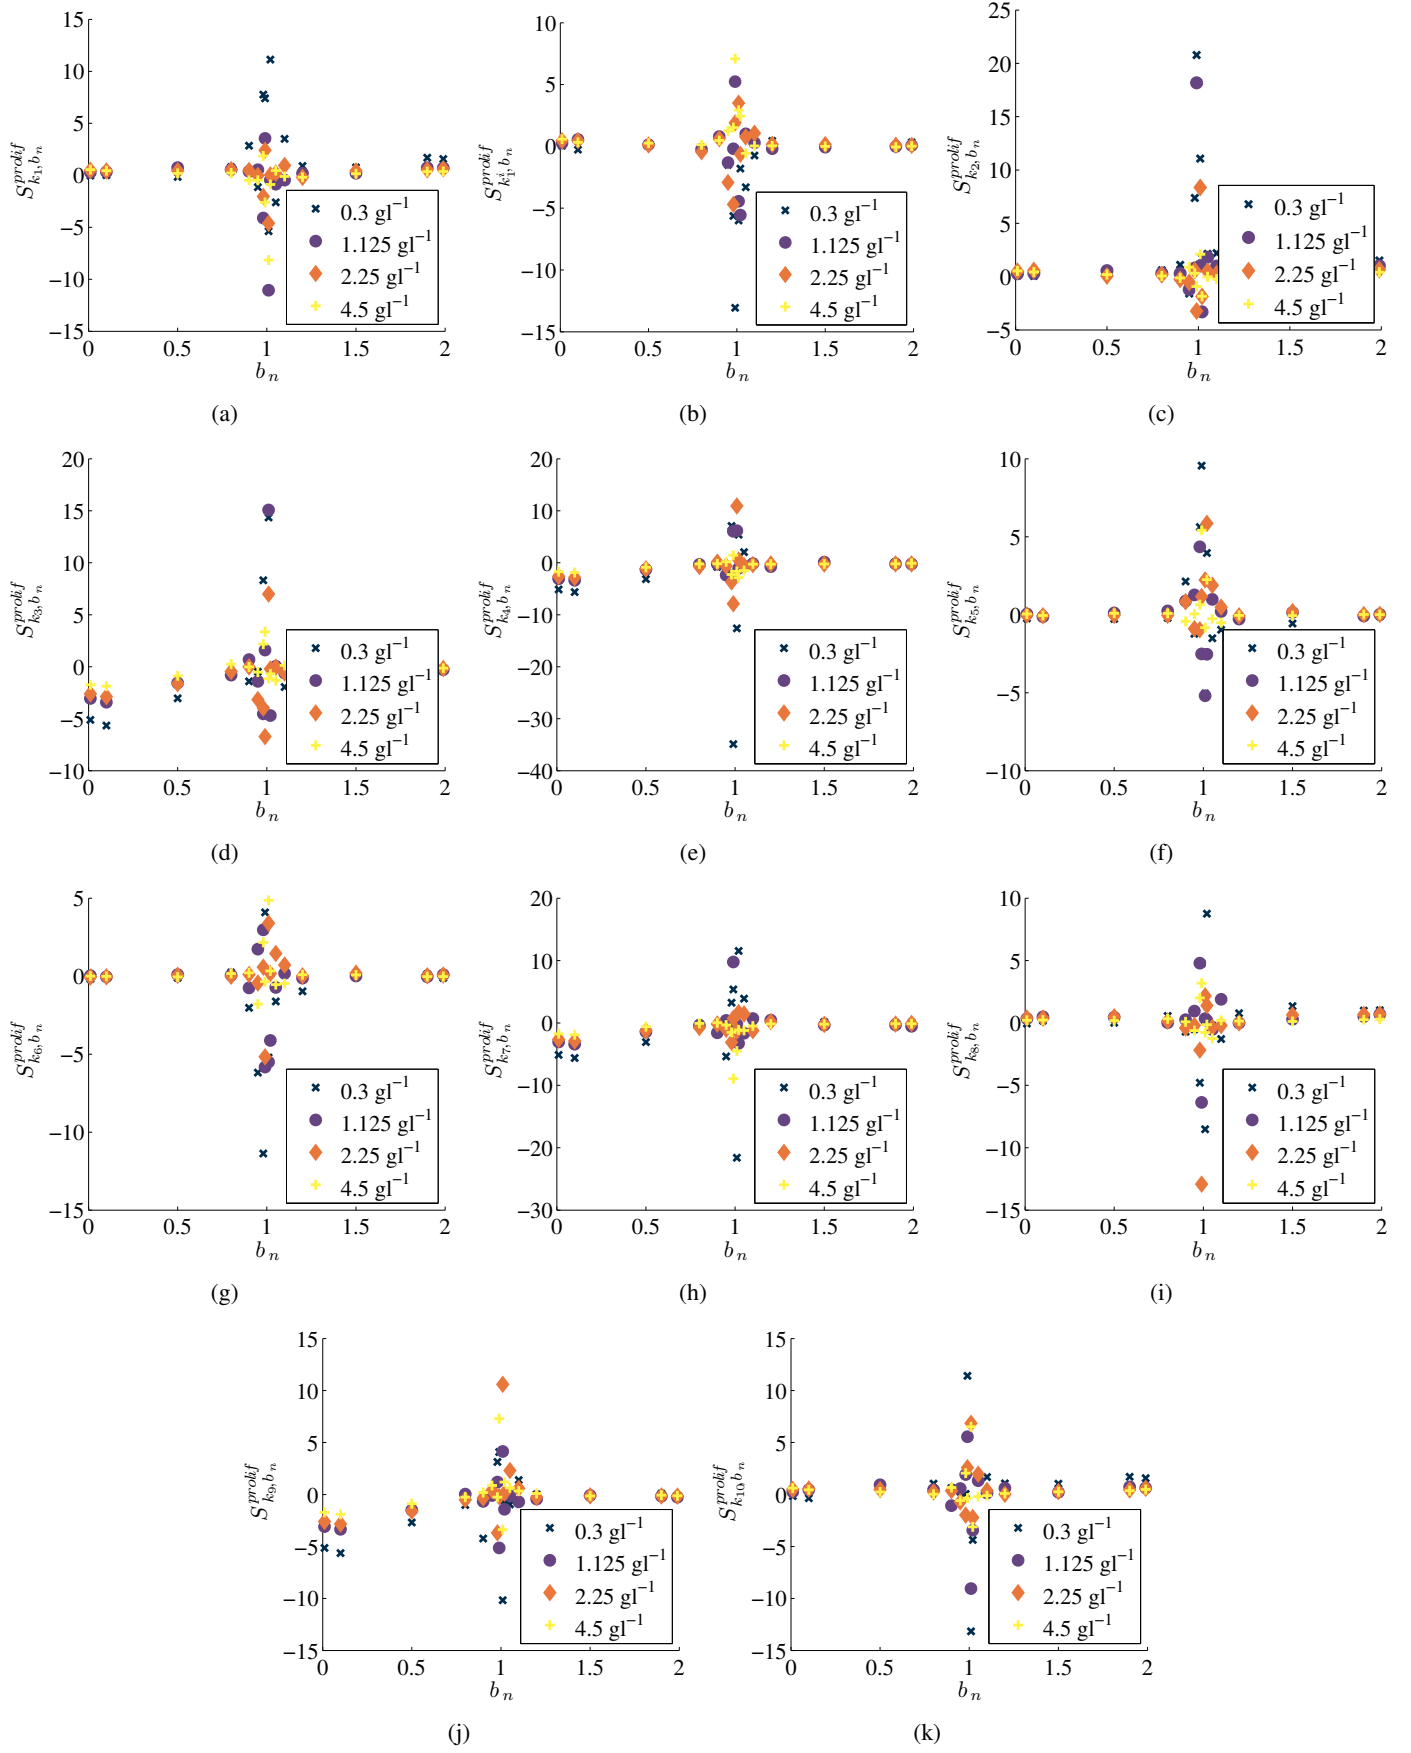

Figure S5:  $S^{prolif}$  for all parameters in parameter group 1.

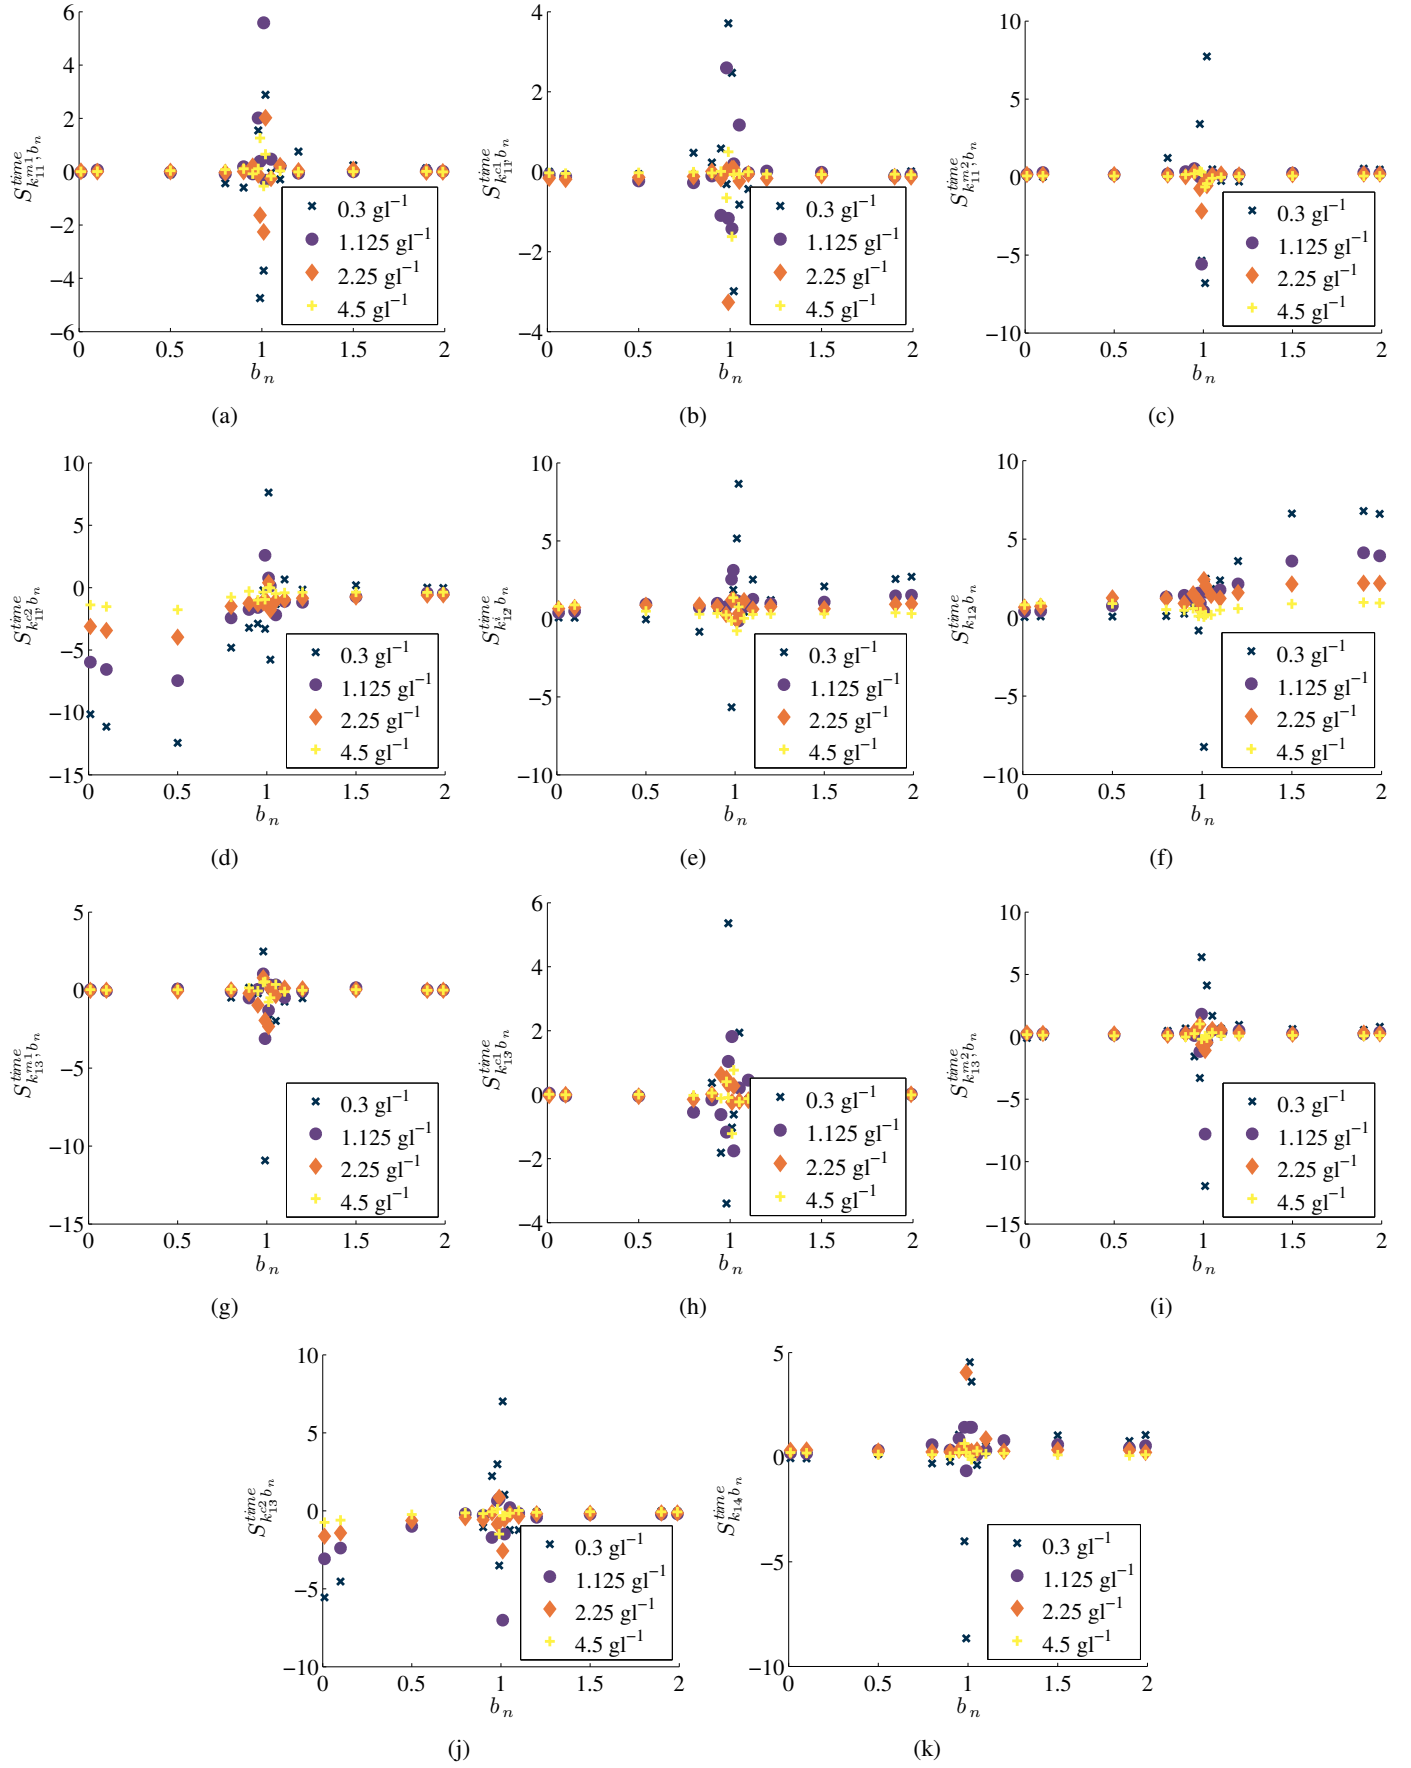

Figure S6:  $S^{time}$  for all parameters in parameter group 2.

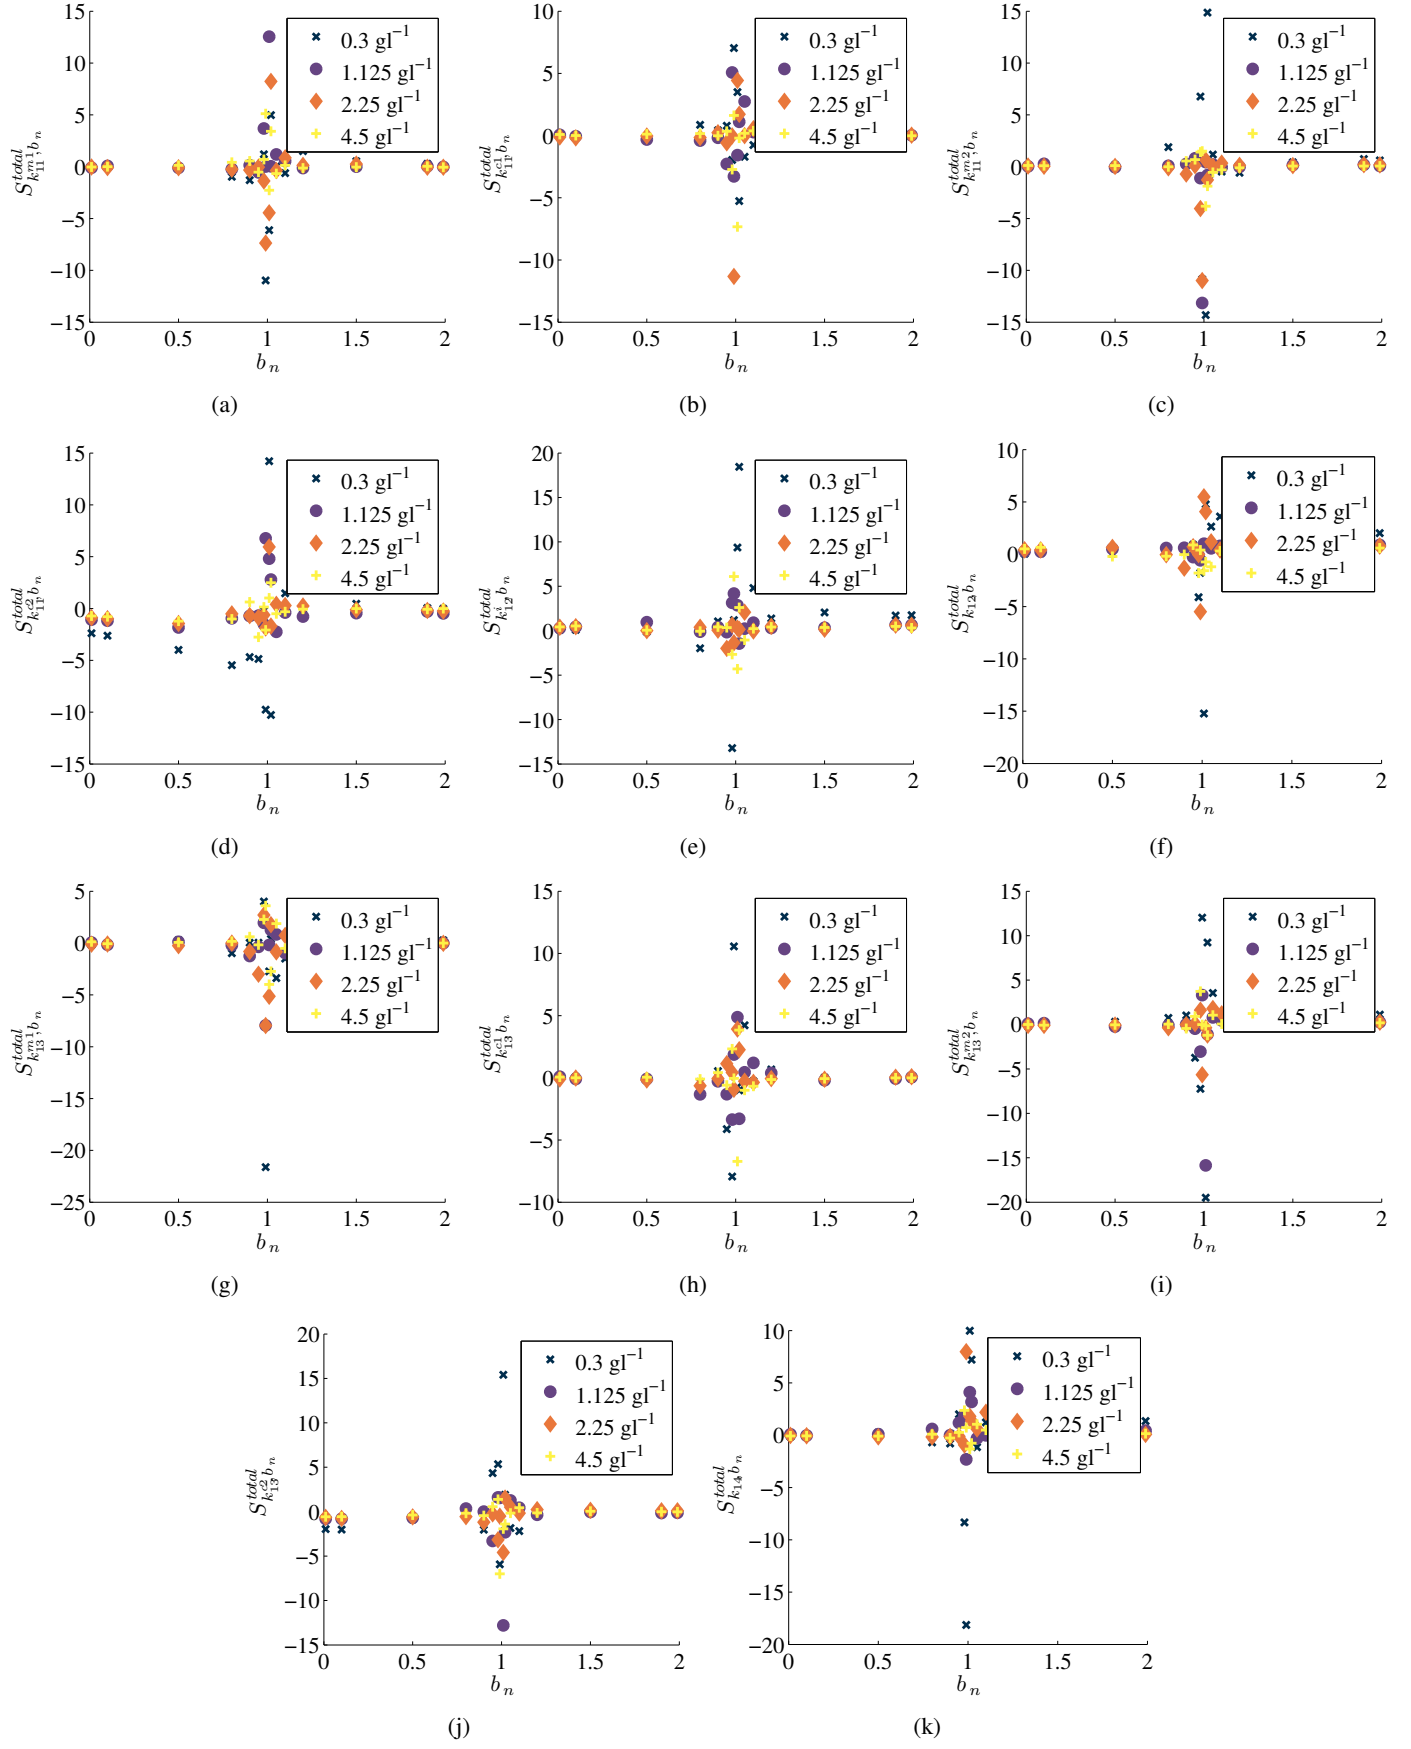

Figure S7:  $S^{total}$  for all parameters in parameter group 2.

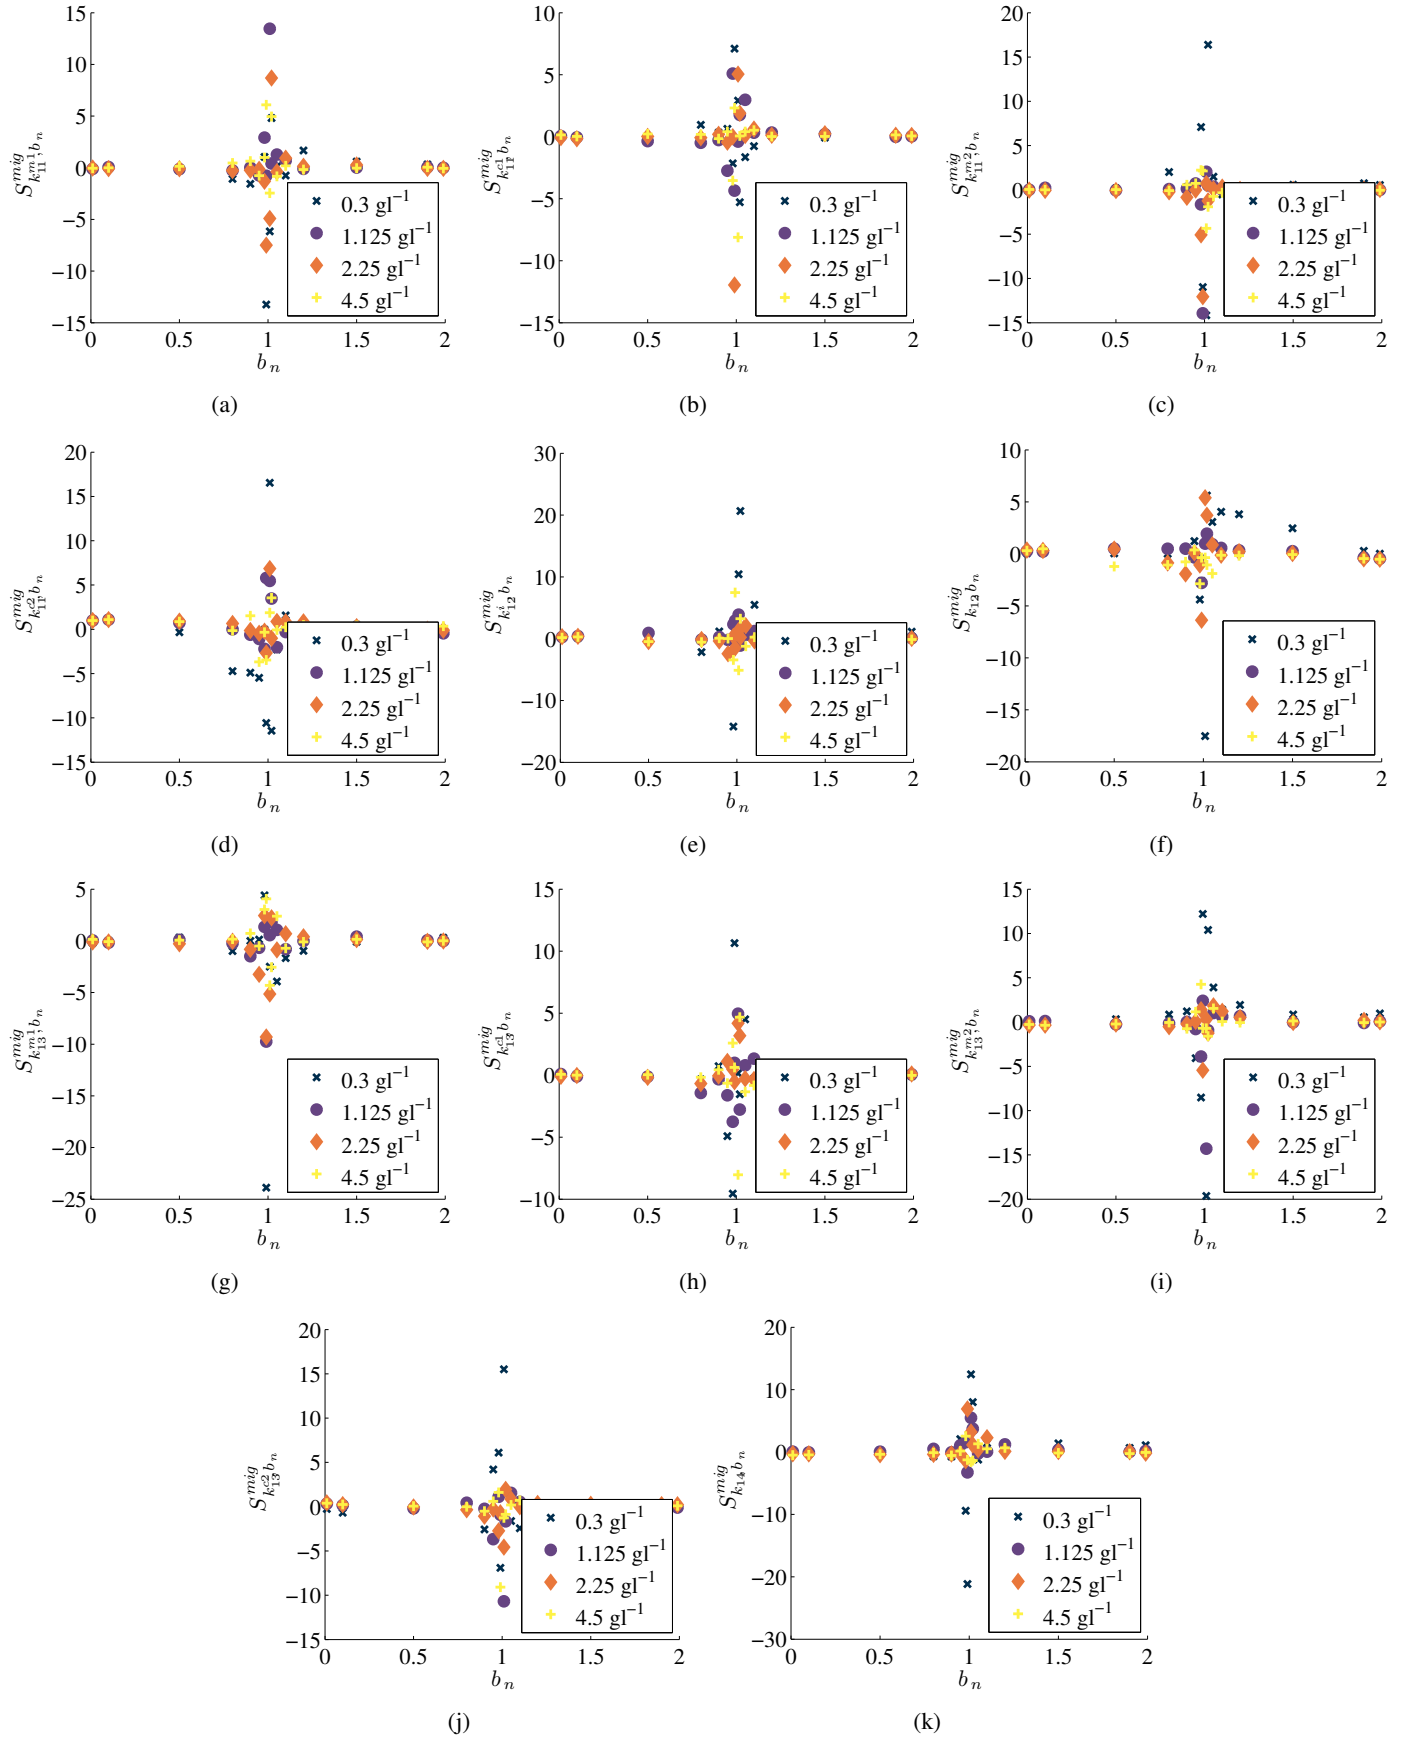

Figure S8:  $S^{mig}$  for all parameters in parameter group 2.



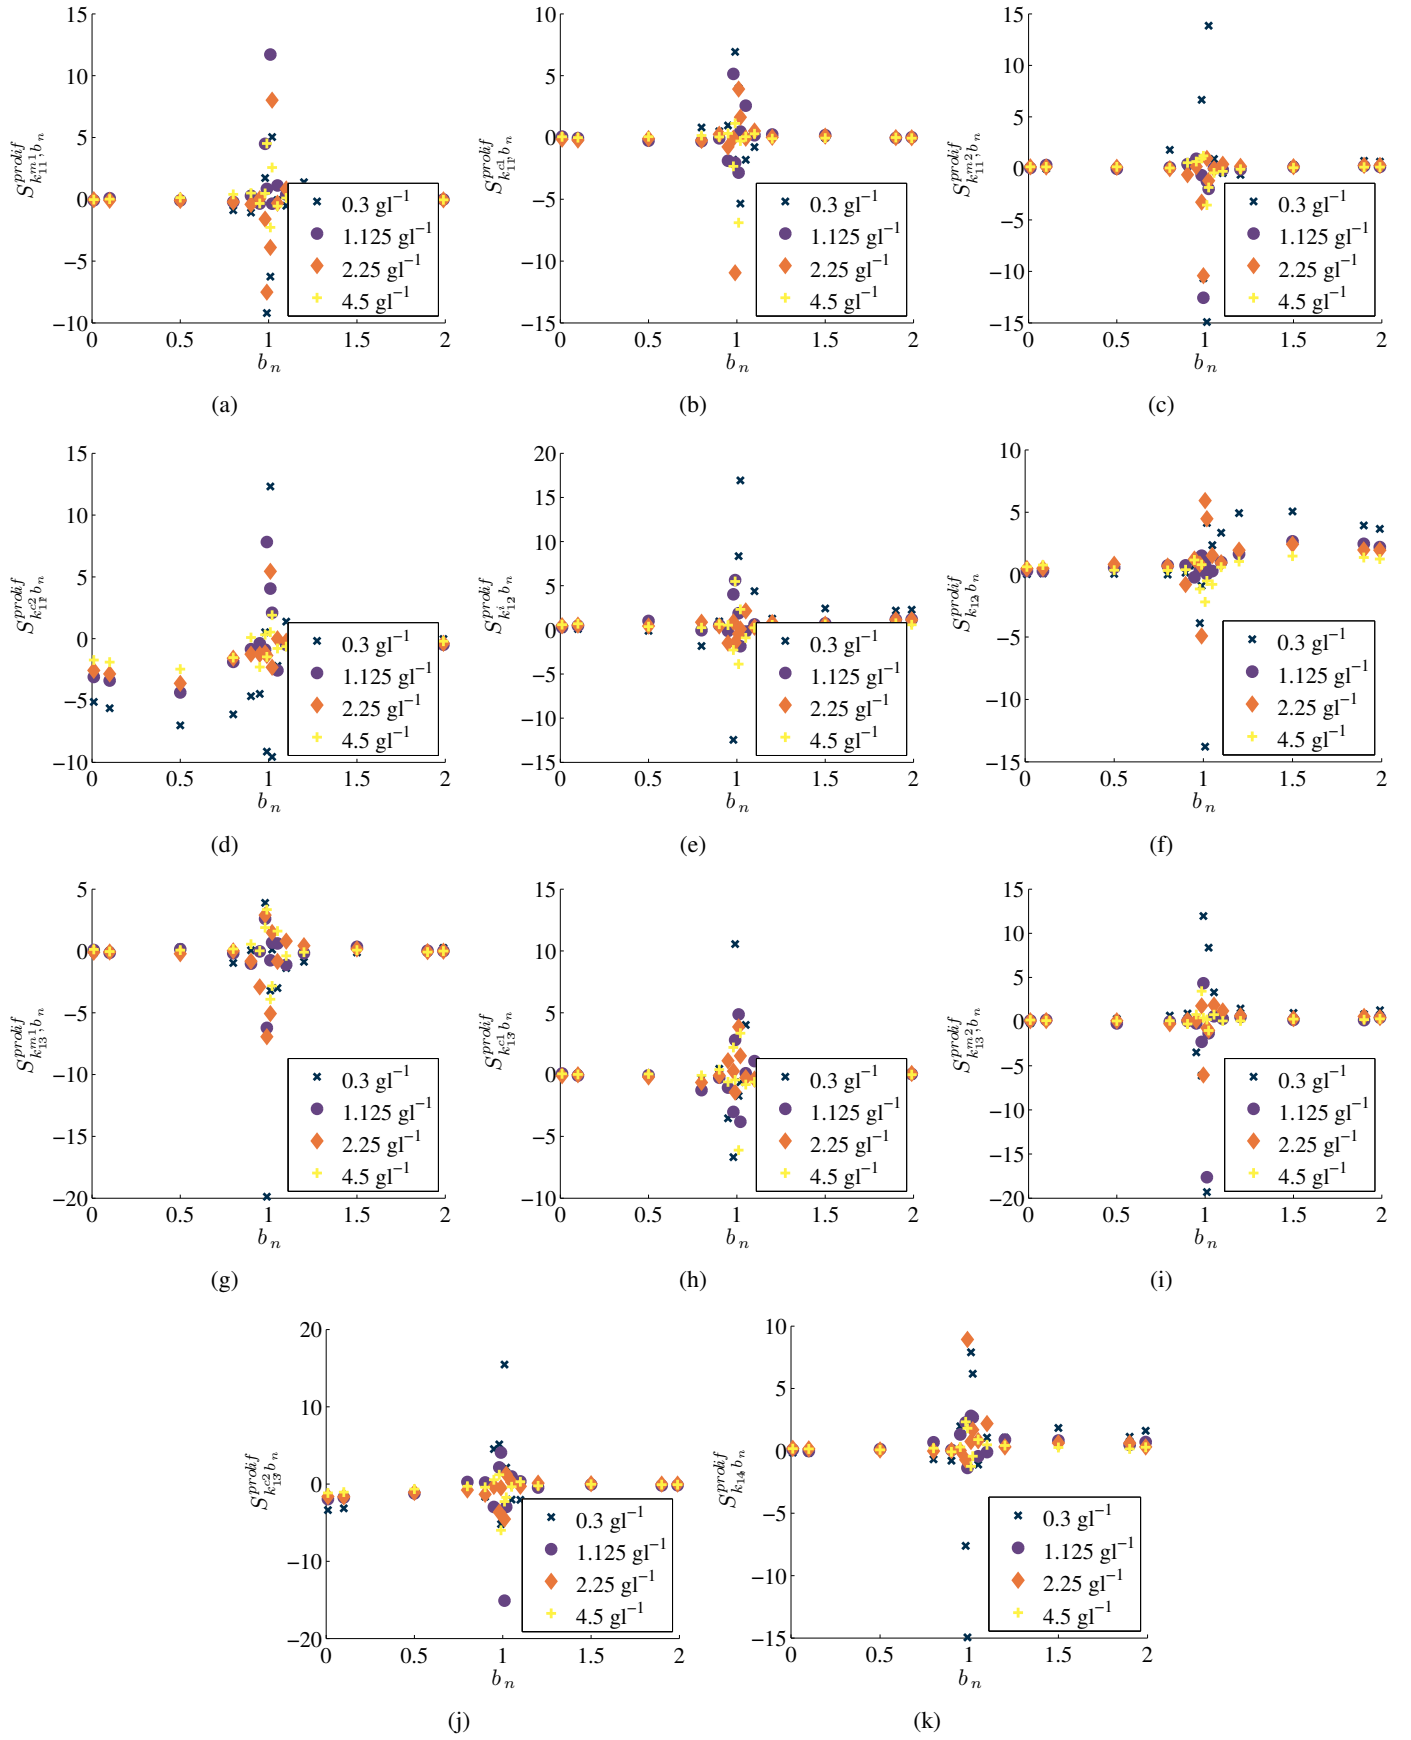

Figure S9:  $S^{prolif}$  for all parameters in parameter group 2.

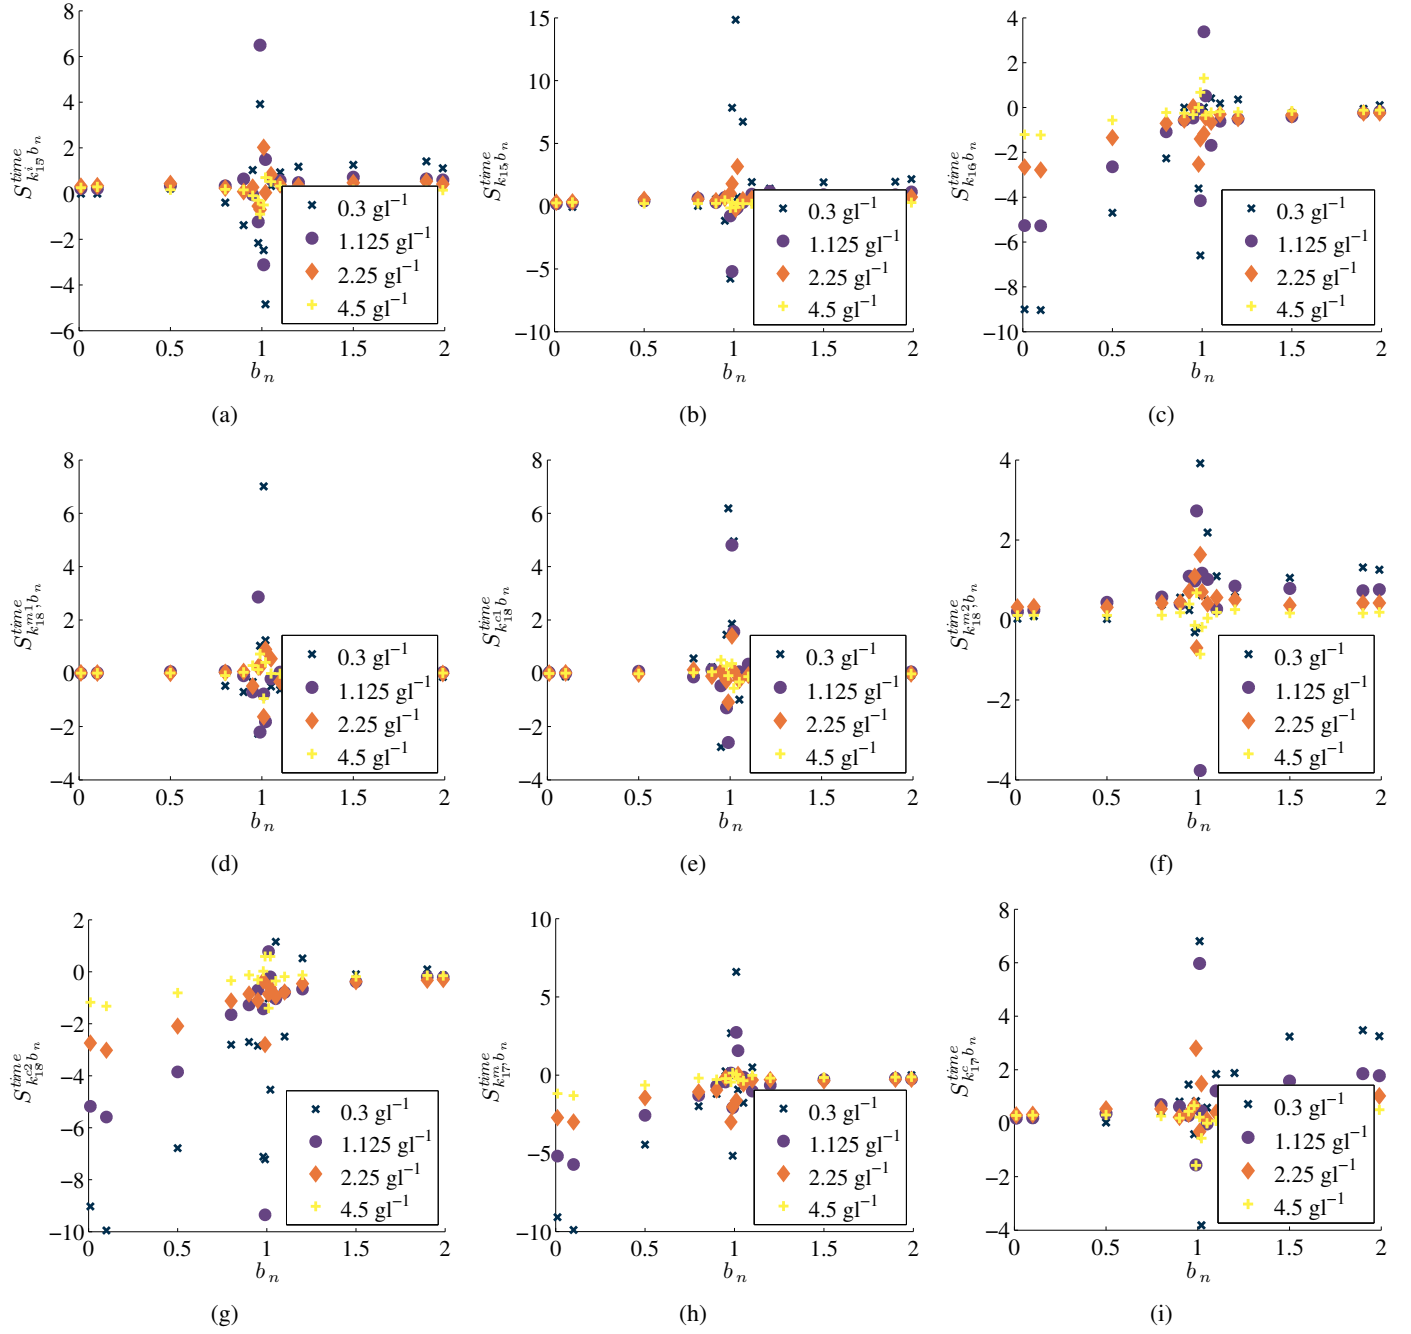

Figure S10:  $S^{time}$  for all parameters in parameter group 3.

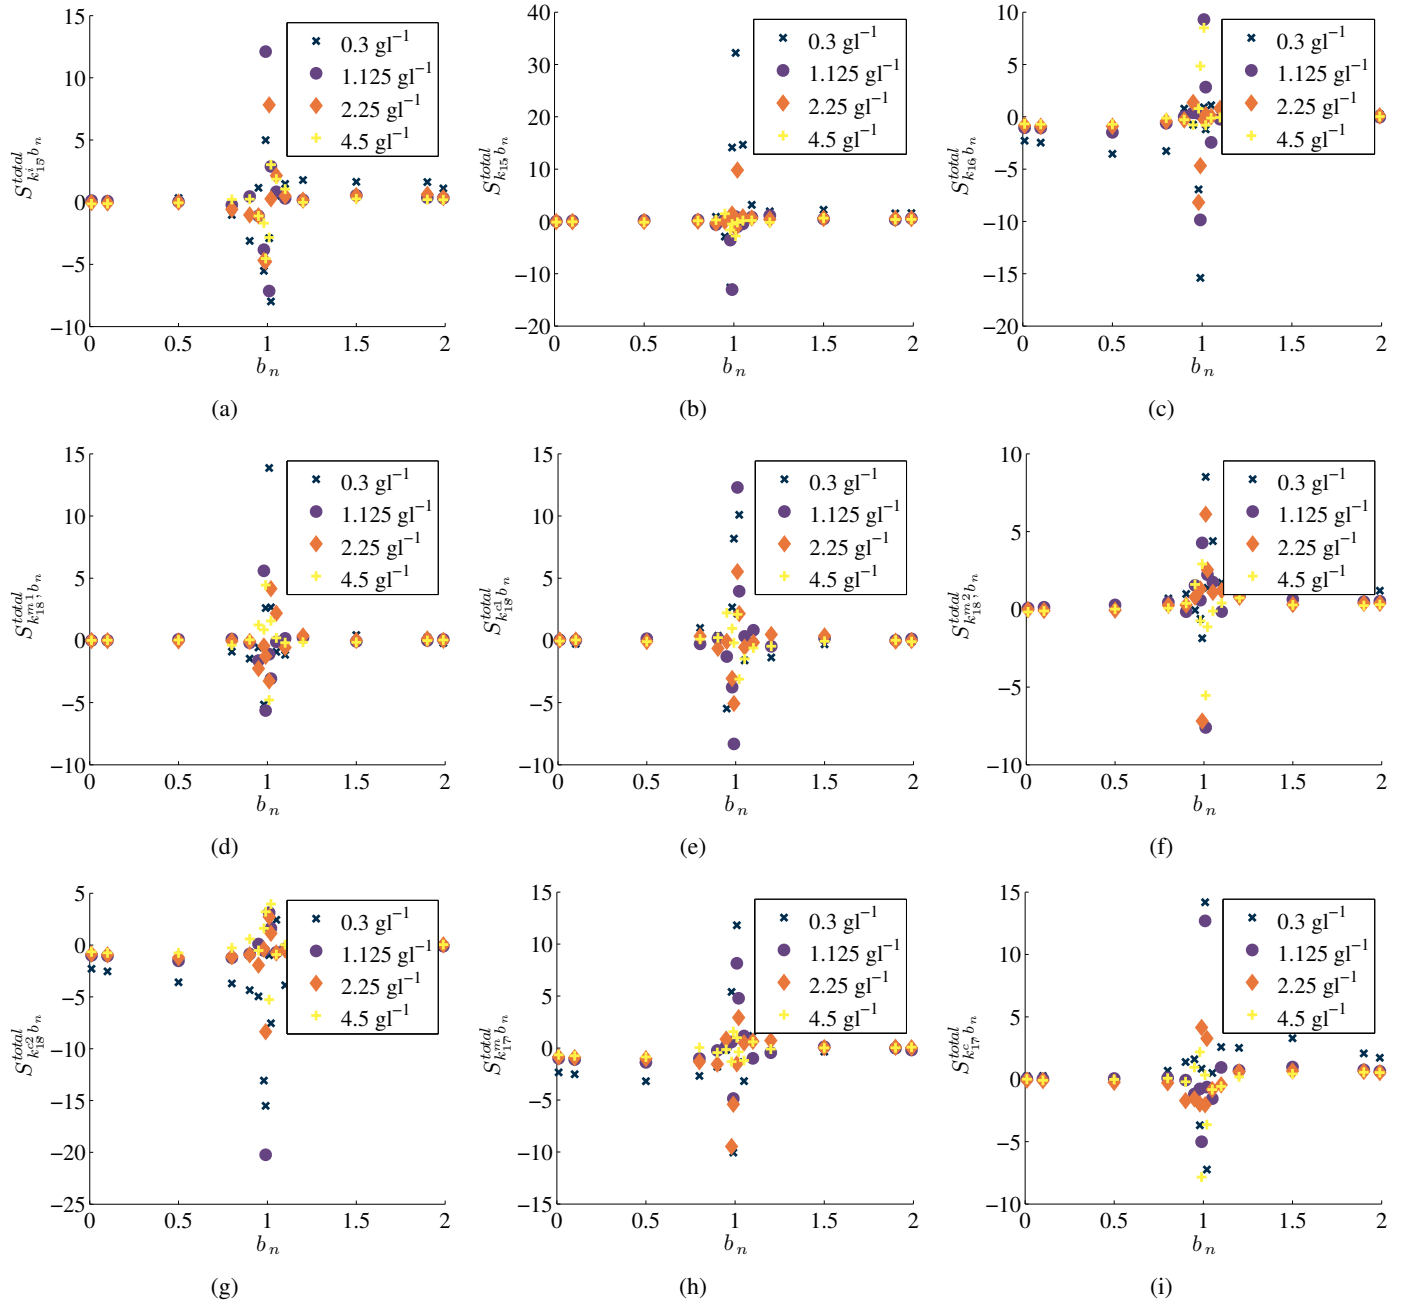

Figure S11:  $S^{\text{total}}$  for all parameters in parameter group 3.

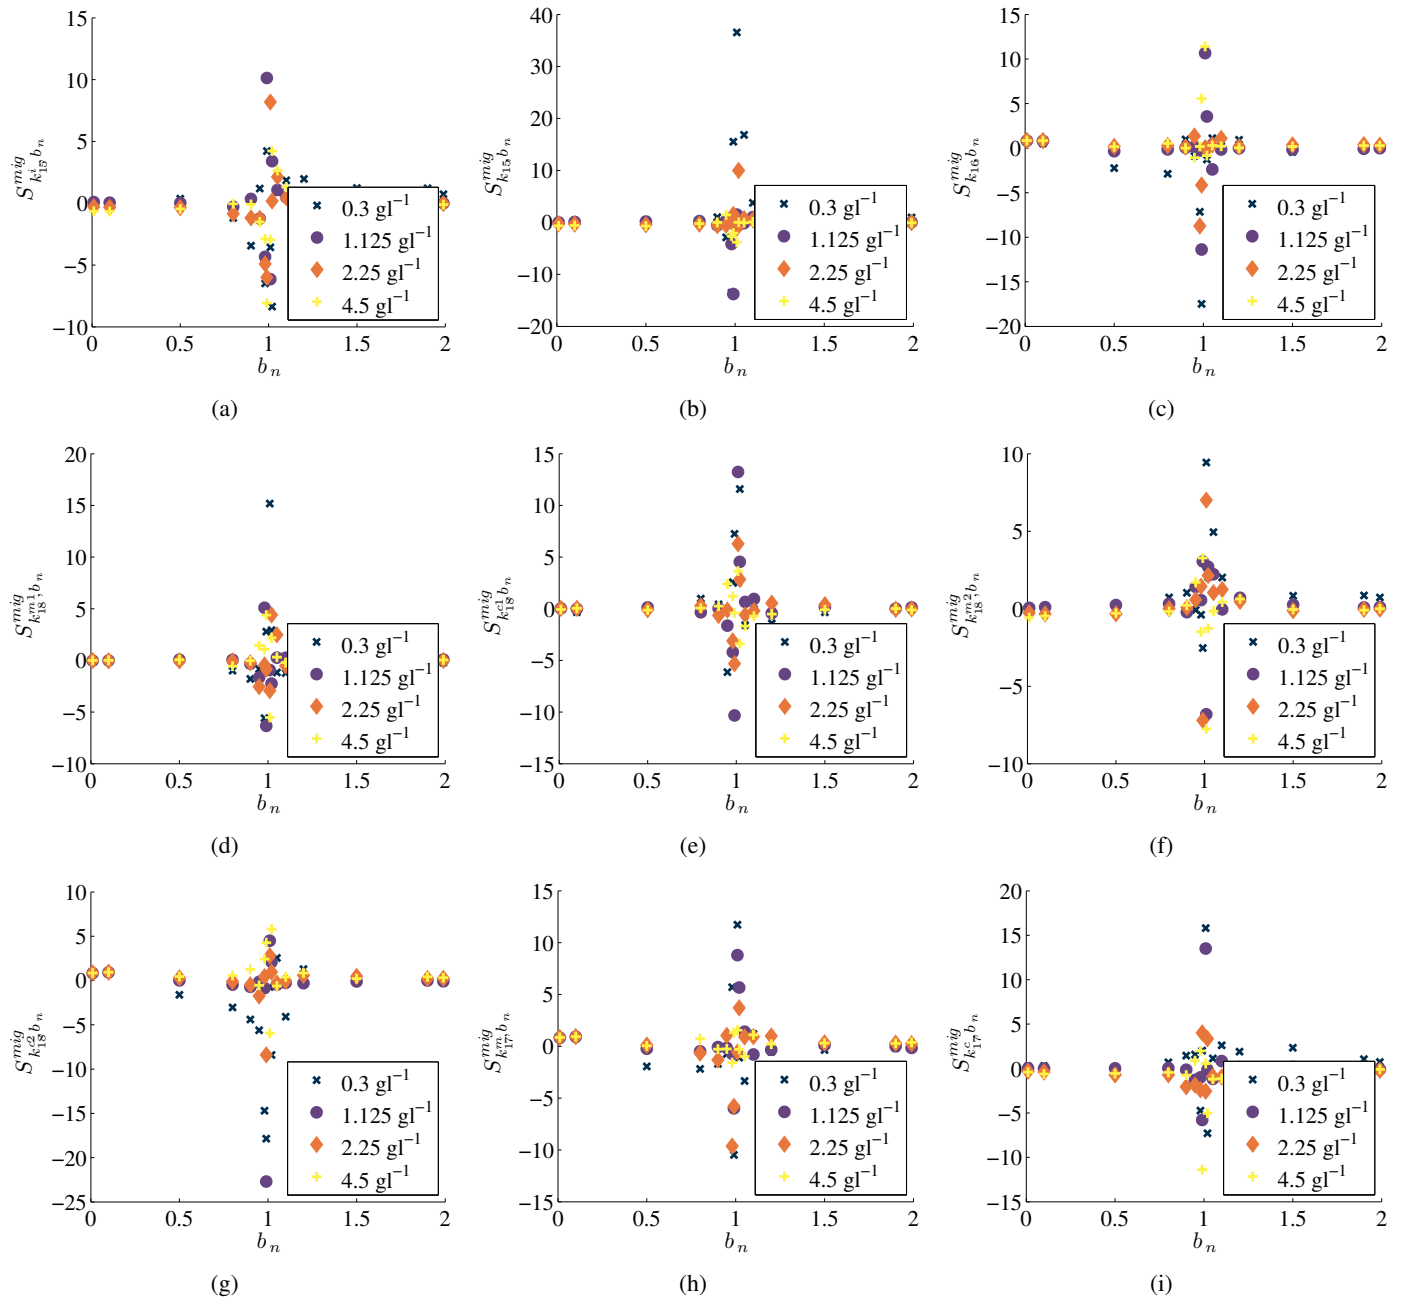

Figure S12:  $S^{mig}$  for all parameters in parameter group 3.

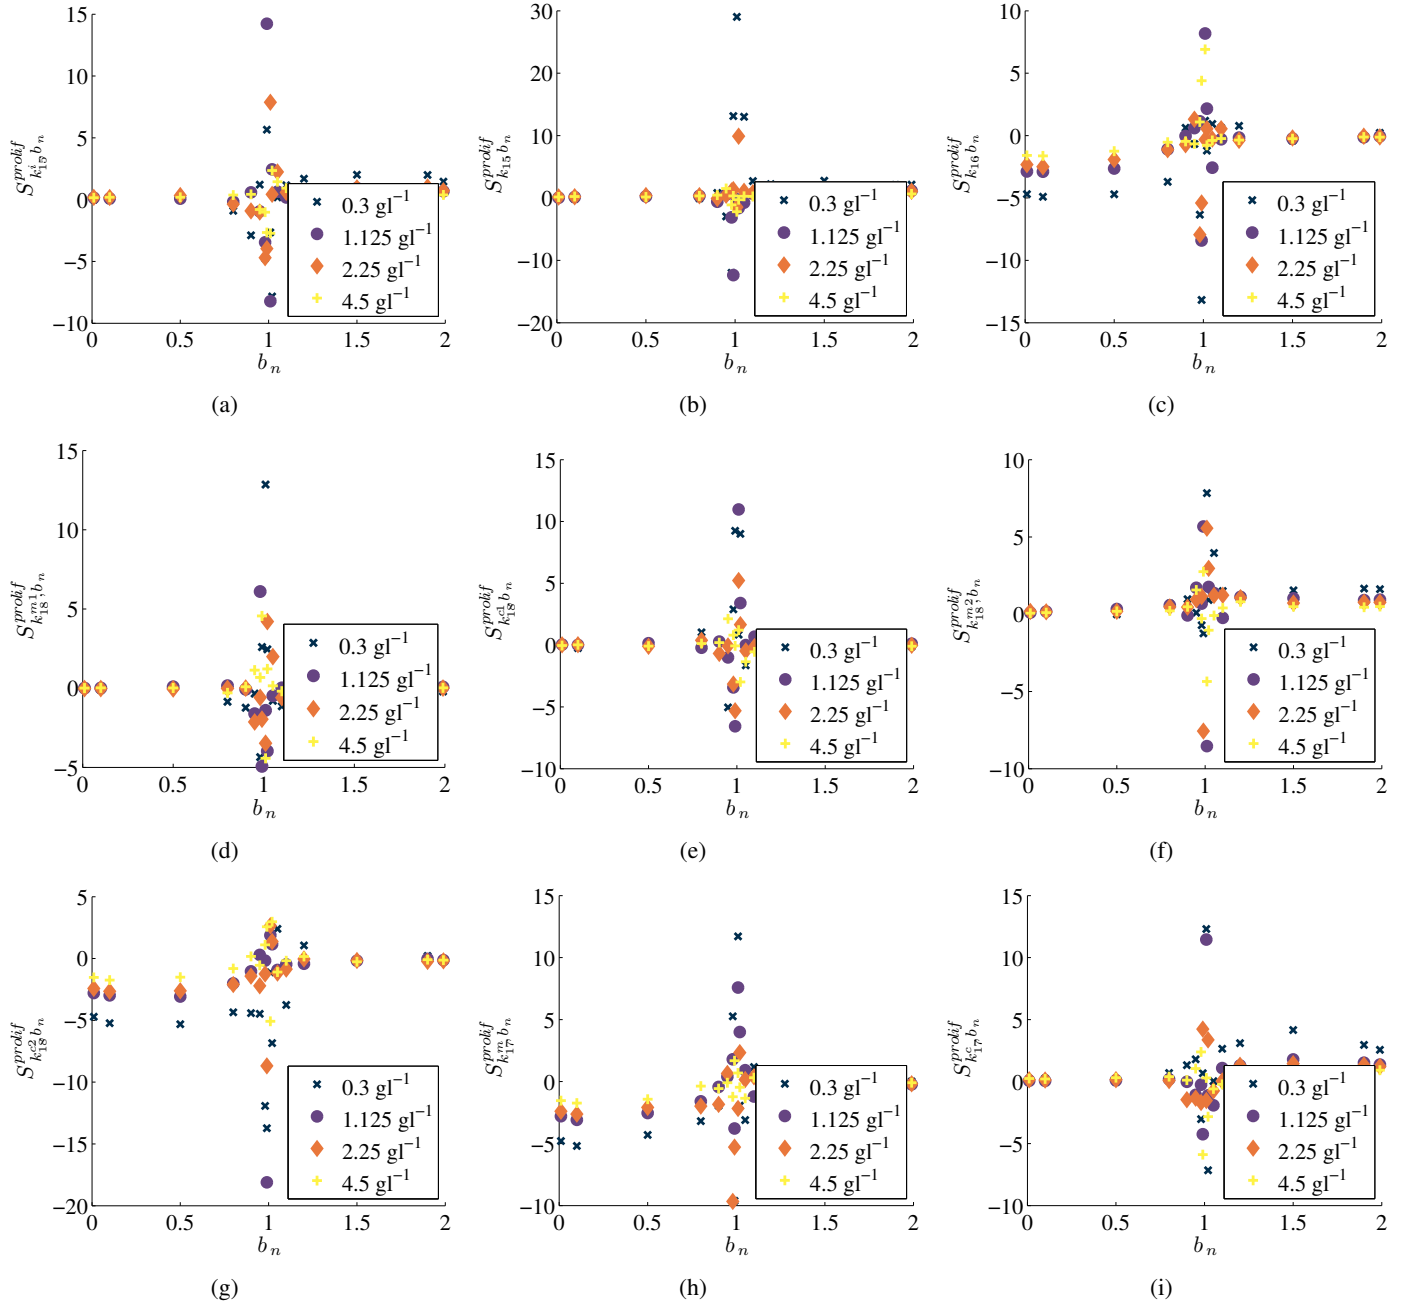

Figure S13:  $S^{prolif}$  for all parameters in parameter group 3.
